# Supplementary material for: Tropospheric NO 2 vertical profiles over South Korea and their relation to oxidant chemistry: implications for geostationary satellite retrievals and the observation of NO 2 diurnal variation from space
Source: Copernicus journal article supplement (doi:10.5194/acp-23-2465-2023), 2023-02-22
Supplement: Supplementary file 1 [file acp-23-2465-2023-supplement.pdf]

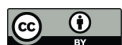

*Supplement of*

**Tropospheric NO<sub>2</sub> vertical profiles over South Korea and their relation to oxidant chemistry: implications for geostationary satellite retrievals and the observation of NO<sub>2</sub> diurnal variation from space**

**Laura Hyesung Yang et al.**

*Correspondence to:* Laura Hyesung Yang ([laurayang@g.harvard.edu](mailto:laurayang@g.harvard.edu))

The copyright of individual parts of the supplement might differ from the article licence.

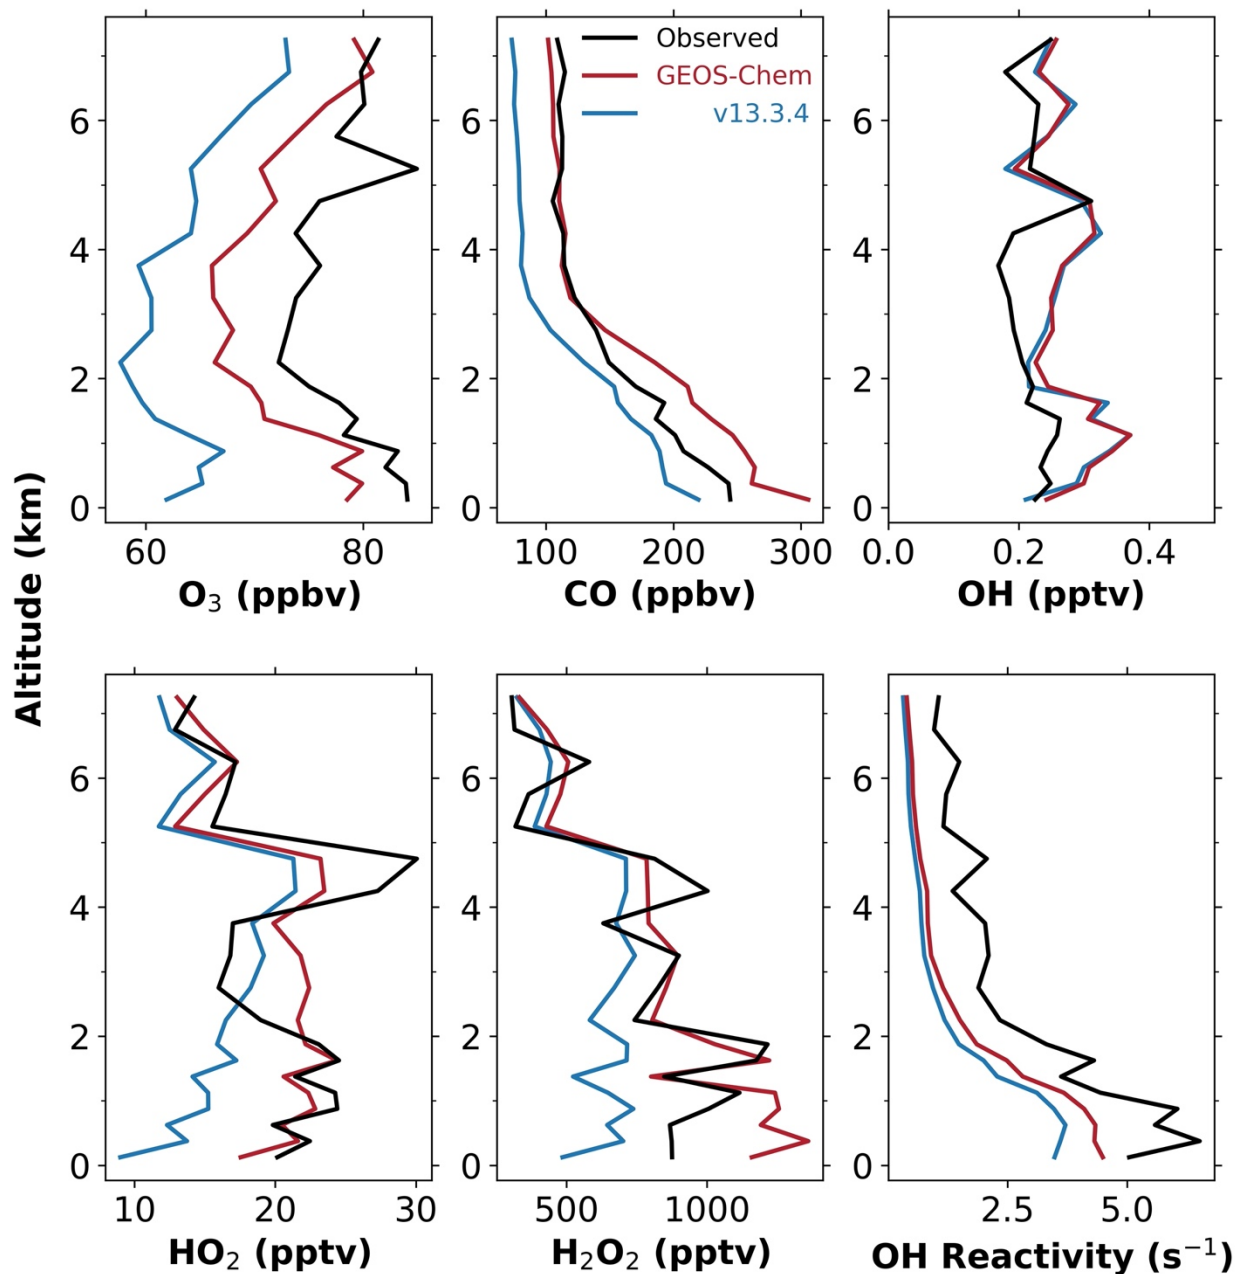

**Figure S1.** Median vertical profiles of species concentrations and OH reactivity (OHR) in the non-SMA (outside of the SMA domain which is 37 – 37.6°N, 126.6 – 127.7°E) during KORUS-AQ. Aircraft observations are compared to our GEOS-Chem simulation and the standard version 13.3.4 of the model.

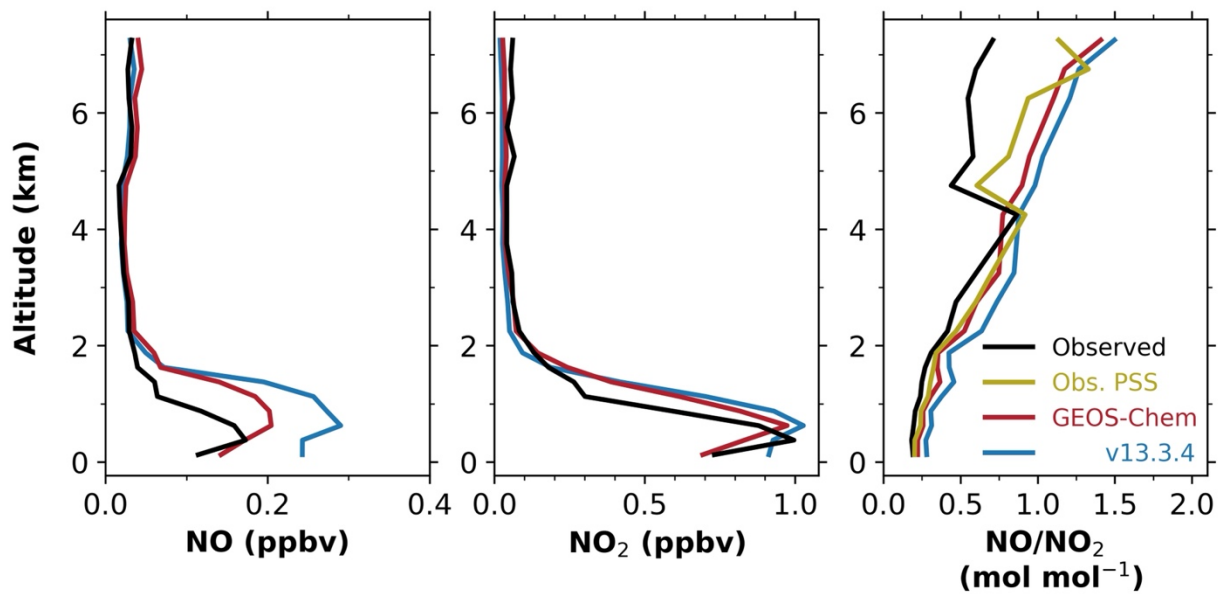

**Figure S2.** Median vertical profiles of NO and NO<sub>2</sub> concentrations, and NO/NO<sub>2</sub> molar concentration ratios in the non-SMA (outside of the SMA domain which is 37 – 37.6°N, 126.6 – 127.7°E) during the KORUS-AQ campaign. Observations are compared to our GEOS-Chem simulation and the standard version 13.3.4 of the model. PSS for the NO/NO<sub>2</sub> ratio denotes a photochemical steady state as given by equation (4) and is computed mainly from observations. Observed ratios are computed only if both species are more than 2× above the limit of detection.
